# Supplementary material for: Performance of a HeartLogicTM Based Care Path in the Management of a Real-World Chronic Heart Failure Population
Source: PubMed Central journal article supplement (PMC9120607; doi:10.3389/fcvm.2022.883873), 2022-05-06
Supplement: Image_1.pdf [file Image_1.pdf]

## *Supplementary Material*

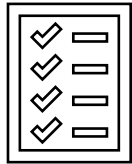

|                                                       |  |
|-------------------------------------------------------|--|
| The heart failure questionnaire                       |  |
| Shortness of breath last night                        |  |
| Shortness of breath during the past 24 hours          |  |
| Edema in the legs or abdomen                          |  |
| Feeling unwell during the past 24 hours               |  |
| Increased liquid oral intake during the past 24 hours |  |
| Excessive salt intake during the past 24 hours        |  |
| Dizziness or lightheadedness                          |  |
| Dizziness or lightheadedness when standing up         |  |
| Dizziness or lightheadedness when walking             |  |
| Decreased intake during past 24 hours                 |  |
| Diarrhea or vomiting during past 24 hours             |  |

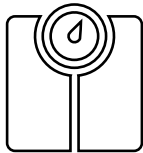

|                                   |  |
|-----------------------------------|--|
| ≥ 2kg weight gain in 2 days       |  |
| Higher blood pressure than normal |  |

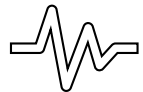

|                |  |
|----------------|--|
| New arrhythmia |  |
|----------------|--|

**Supplementary Figure 1.** The heart failure questionnaire
